# Supplementary material
Source: PubMed Central journal article supplement (PMC4423561)
Supplement: NIHMS645014-supplement-01.pdf [file NIHMS645014-supplement-01.pdf]

## **Supplemental Material**

**Movie E1.** Representative free-breathing DCE images of a healthy subject from 30 slices out of a total of 60. Both subtle contrast dynamic changes and abdominal respiratory motion can be captured with the high temporal resolution of 1.6 sec/volume.

Movie E1.mp4

**Movie E2.** Registered images from the same dataset shown in Movie E1.

Movie E2.mp4
